# Supplementary material for: Anthracene-based covalent organic framework supported palladium nanoparticles for visible-light-mediated Suzuki–Miyaura cross-coupling
Source: Royal Society of Chemistry journal article supplement (doi:10.1039/d4cy01083c), 2024-01-01
Supplement: d4cy01083c1.pdf [file d4cy01083c1.pdf]

## **Anthracene-based covalent organic framework supported palladium nanoparticles for visible-light-mediated Suzuki- Miyaura cross-coupling**

Lei Li,<sup>a</sup> Qiujie Shan,<sup>a</sup> Jiyuan Zang,<sup>a</sup> Lei Yu,<sup>a</sup> David J. Young,<sup>b</sup> Zhi-Gang Ren<sup>a</sup> and  
Hong-Xi Li<sup>a,\*</sup>

<sup>a</sup> College of Chemistry, Chemical Engineering and Materials Science, Soochow  
University, Suzhou 215123, People's Republic of China

<sup>b</sup> James Watt School of Engineering, University of Glasgow, University Avenue,  
Glasgow, G12 8QQ UK

Corresponding Authors:

\*E-mail: lihx@suda.edu.cn.

## Table of Contents

|                                                                                                                            |     |
|----------------------------------------------------------------------------------------------------------------------------|-----|
| <b>Experimental</b> .....                                                                                                  | S3  |
| <b>Fig. S1</b> FT-IR spectra of Tp, Ant, AntCOF and Pd/AntCOF. ....                                                        | S4  |
| <b>Fig. S2</b> Histogram illustrating the particle size distribution before (a) and after (b) photocatalytic reaction..... | S4  |
| <b>Fig. S3</b> Photocurrent spectra of AntCOF and Pd/AntCOF.....                                                           | S5  |
| <b>Fig. S4</b> The emission spectra of AntCOF and Pd/AntCOF in EtOH. ....                                                  | S5  |
| <b>Fig. S5</b> The reaction set-up with blue LEDs. ....                                                                    | S5  |
| <b><sup>1</sup>H and <sup>13</sup>C NMR data of products</b> .....                                                         | S6  |
| <b>References</b> .....                                                                                                    | S11 |
| <b>NMR spectra</b> .....                                                                                                   | S12 |

## Experimental

### Synthesis of AntCOF

Ant (46.0 mg, 0.128 mmol) and 1,3,5-triformylphloroglucinol (18.0 mg, 0.086 mmol) were added sequentially to a 25 mL Pyrex tube with homogenization of the mixture by ultrasonication. After three freeze-pump-thaw cycles, the reaction flask was sealed under vacuum and placed in an oil bath at 150 °C for 72 h. After cooling to room temperature, the solids were collected by centrifugation, and the precipitates were washed with anhydrous N,N-dimethylacetamide, tetrahydrofuran, and acetone, and then dried under vacuum at 80 °C overnight to obtain a light yellow powder, AntCOF. Yield: 40 mg (62.5%).

### Synthesis of Pd/AntCOF

AntCOF (100 mg), Pd(OAc)<sub>2</sub> (22.4 mg, 0.1 mmol) and anhydrous ethanol (25 mL) were added to a 100 mL round bottom flask. The mixture was ultrasonically dispersed and stirred at room temperature for 1 h. An ethanol solution of sodium borohydride (0.1 M, 5.0 mL) was then added and the reaction was continued for 4 h. A green precipitate was obtained by centrifugation, and the solids were washed sequentially with ethanol and ether, and dried under vacuum at 80 °C to obtain the green solid powder, Pd/AntCOF.

### Typical procedure for Suzuki-Miyaura cross-coupling reaction

Aryl bromide (0.2 mmol), arylboronic acid (0.3 mmol), Pd/AntCOF (8 mg), K<sub>3</sub>PO<sub>4</sub> (0.3 mmol), and water (5 mL) were sequentially added to a 15 mL quartz tube under a nitrogen atmosphere. The mixture was stirred under a blue LED (410-430 nm) lamp at ambient temperature for 12 h with fan cooling. After this period, the solid was filtered and washed with ethyl acetate and water. The solution was extracted three times with ethyl acetate (3 × 5 mL). The combined organic layers were washed with brine, dried with anhydrous Na<sub>2</sub>SO<sub>4</sub> and concentrated under reduced pressure. The residue was purified by flash column chromatography using petroleum ether and ethyl acetate as the eluent.



Fig. S1 FT-IR spectra of Tp, Ant, AntCOF and Pd/AntCOF.



Fig. S2 Histogram illustrating the particle size distribution before (a) and after (b) photocatalytic reaction.



**Fig. S3** Photocurrent spectra of AntCOF and Pd/AntCOF.



**Fig. S4** The emission spectra of AntCOF and Pd/AntCOF in EtOH.



**Fig. S5** The reaction set-up with blue LEDs

## Analytical data of the products

### 1-([1,1'-biphenyl]-4-yl)ethan-1-one (3a)<sup>S1</sup>



<sup>1</sup>H NMR (400 MHz, CDCl<sub>3</sub>) δ 8.03 (d, *J* = 8.5 Hz, 2H), 7.69 (d, *J* = 8.5 Hz, 2H), 7.63 (d, *J* = 7.4 Hz, 2H), 7.47 (t, *J* = 7.4 Hz, 2H), 7.40 (t, *J* = 7.3 Hz, 1H), 2.64 (s, 3H).

<sup>13</sup>C NMR (100 MHz, CDCl<sub>3</sub>) δ 197.8, 145.8, 139.9, 135.9, 129.0, 128.9, 128.3, 127.3, 127.3, 26.7.

### 1-(4'-methyl-[1,1'-biphenyl]-4-yl)ethan-1-one (3b)<sup>S2</sup>



<sup>1</sup>H NMR (400 MHz, CDCl<sub>3</sub>) δ 8.01 (d, *J* = 8.4 Hz, 2H), 7.66 (d, *J* = 8.4 Hz, 2H), 7.52 (d, *J* = 8.1 Hz, 2H), 7.27 (d, *J* = 7.9 Hz, 2H), 2.62 (s, 3H), 2.40 (s, 3H).

<sup>13</sup>C NMR (101 MHz, CDCl<sub>3</sub>) δ 197.8, 145.7, 138.3, 137.0, 135.6, 129.7, 128.9, 127.1, 127.0, 26.7, 21.2.

### 1-(4'-methoxy-[1,1'-biphenyl]-4-yl)ethan-1-one (3c)<sup>S2</sup>



<sup>1</sup>H NMR (400 MHz, CDCl<sub>3</sub>) δ 8.01 (d, *J* = 8.4 Hz, 2H), 7.65 (d, *J* = 8.4 Hz, 2H), 7.58 (d, *J* = 8.8 Hz, 2H), 7.00 (d, *J* = 8.8 Hz, 2H), 3.87 (s, 3H), 2.63 (s, 3H).

<sup>13</sup>C NMR (100 MHz, CDCl<sub>3</sub>) δ 197.8, 159.9, 145.4, 135.3, 132.3, 129.0, 128.4, 126.6, 114.4, 55.4, 26.6.

### 1-(4'-(trifluoromethyl)-[1,1'-biphenyl]-4-yl)ethan-1-one (3d)<sup>S3</sup>



<sup>1</sup>H NMR (400 MHz, CDCl<sub>3</sub>) δ 8.06 (d, *J* = 8.4 Hz, 2H), 7.81–7.62 (m, 6H), 2.65 (s, 3H).

<sup>13</sup>C NMR (100 MHz, CDCl<sub>3</sub>) δ 197.6, 144.2, 143.4, 136.6, 130.4, 130.1, 129.1, 127.6, 127.5, 126.0, 125.9, 125.9, 125.95, 125.5, 122.8, 26.7.

<sup>19</sup>F NMR (377 MHz, CDCl<sub>3</sub>) δ -62.54.

**4'-acetyl-[1,1'-biphenyl]-4-carbonitrile (3e)<sup>S2</sup>**



<sup>1</sup>H NMR (400 MHz, CDCl<sub>3</sub>) δ 8.07 (d, *J* = 8.3 Hz, 2H), 7.80–7.71 (m, 4H), 7.69 (d, *J* = 8.4 Hz, 2H), 3.12–2.16 (m, 3H).

<sup>13</sup>C NMR (100 MHz, CDCl<sub>3</sub>) δ 197.5, 144.3, 143.6, 136.9, 132.8, 129.1, 128.0, 127.5, 118.7, 111.9, 26.7.

**1,1'-([1,1'-biphenyl]-4,4'-diyl)bis(ethan-1-one) (3f)<sup>S4</sup>**



<sup>1</sup>H NMR (400 MHz, CDCl<sub>3</sub>) δ 8.13–8.00 (m, 4H), 7.78–7.67 (m, 4H), 2.66 (s, 6H).

<sup>13</sup>C NMR (100 MHz, CDCl<sub>3</sub>) δ 197.6, 144.4, 136.6, 129.0, 127.5, 26.7.

**1-(3'-methyl-[1,1'-biphenyl]-4-yl)ethan-1-one (3g)<sup>S4</sup>**



<sup>1</sup>H NMR (400 MHz, CDCl<sub>3</sub>) δ 8.01 (d, *J* = 8.4 Hz, 2H), 7.66 (d, *J* = 8.4 Hz, 2H), 7.37 (t, *J* = 7.9 Hz, 1H), 7.20 (d, *J* = 7.7 Hz, 1H), 7.14 (s, 1H), 6.94 (dd, *J* = 8.2, 2.0 Hz, 1H), 3.86 (s, 3H), 2.62 (s, 3H).

<sup>13</sup>C NMR (100 MHz, CDCl<sub>3</sub>) δ 197.8, 146.0, 139.9, 138.6, 135.8, 129.0, 128.9, 128.1, 127.2, 124.4, 26.7, 21.6.

**1-(3',5'-dimethyl-[1,1'-biphenyl]-4-yl)ethan-1-one (3h)<sup>S5</sup>**



<sup>1</sup>H NMR (400 MHz, CDCl<sub>3</sub>) δ 8.07 (d, *J* = 8.5 Hz, 2H), 7.93 (t, *J* = 9.2 Hz, 2H), 7.81 (d, *J* = 8.3 Hz, 2H), 7.76 (dd, *J* = 8.5, 1.7 Hz, 1H), 7.52 (dd, *J* = 6.4, 2.6 Hz, 3H), 2.65 (s, 6H).

<sup>13</sup>C NMR (100 MHz, CDCl<sub>3</sub>) δ 197.8, 145.7, 137.2, 135.9, 133.6, 133.0, 129.0, 128.7, 128.4, 127.7, 127.5, 126.6, 126.5, 126.4, 125.2, 26.7.

**1-(4-(naphthalen-2-yl)phenyl)ethan-1-one (3i)<sup>S2</sup>**



<sup>1</sup>H NMR (400 MHz, CDCl<sub>3</sub>) δ 8.07 (d, *J* = 8.5 Hz, 3H), 7.93 (t, *J* = 9.2 Hz, 3H), 7.81 (d, *J* = 8.3 Hz, 2H), 7.76 (dd, *J* = 8.5, 1.7 Hz, 1H), 7.52 (dd, *J* = 6.4, 2.6 Hz, 2H), 2.65 (s, 3H).

<sup>13</sup>C NMR (100 MHz, CDCl<sub>3</sub>) δ 197.8, 172.2, 145.7, 137.2, 135.9, 133.6, 133.04, 129.0, 128.7, 128.4, 127.7, 127.5, 126.6, 126.5, 126.4, 125.2, 26.7.

**1-(4-(pyridin-4-yl)phenyl)ethan-1-one (3j)<sup>S6</sup>**



<sup>1</sup>H NMR (400 MHz, CDCl<sub>3</sub>) δ 8.71 (d, *J* = 3.5 Hz, 2H), 8.20–7.91 (m, 2H), 7.82–7.64 (m, 2H), 7.54 (dd, *J* = 4.6, 1.5 Hz, 2H), 2.66 (s, 3H).

<sup>13</sup>C NMR (100 MHz, CDCl<sub>3</sub>) δ 197.5, 150.5, 147.1, 142.6, 137.3, 129.1, 127.3, 121.7, 26.8.

**4-methyl-1,1'-biphenyl (3k)<sup>S1</sup>**



<sup>1</sup>H NMR (400 MHz, CDCl<sub>3</sub>) δ 7.58 (d, *J* = 7.2 Hz, 2H), 7.48 (t, *J* = 7.9 Hz, 2H), 7.42 (t, *J* = 7.6 Hz, 2H), 7.32 (t, *J* = 7.4 Hz, 1H), 7.27–7.23 (m, 2H), 2.40 (s, 3H).

<sup>13</sup>C NMR (100 MHz, CDCl<sub>3</sub>) δ 141.2, 138.4, 137.1, 129.5, 128.8, 127.1, 127.0, 21.2.

**4-(trifluoromethyl)-1,1'-biphenyl (3l)<sup>S1</sup>**



<sup>1</sup>H NMR (400 MHz, CDCl<sub>3</sub>) δ 7.70 (d, *J* = 5.6 Hz, 4H), 7.60 (d, *J* = 7.6 Hz, 2H), 7.47 (t, *J* = 7.5 Hz, 2H), 7.40 (t, *J* = 7.3 Hz, 1H).

<sup>13</sup>C NMR (100 MHz, CDCl<sub>3</sub>) δ 144.8, 139.8, 129.5, 129.2, 129.0, 128.2, 127.4, 127.3, 125.8, 125.7, 125.7, 125.7, 123.0.

<sup>19</sup>F NMR (377 MHz, CDCl<sub>3</sub>) δ -62.38.

**4-methyl-1,1'-biphenyl (3m)<sup>S1</sup>**



$^1\text{H}$  NMR (400 MHz,  $\text{CDCl}_3$ )  $\delta$  7.58 (d,  $J = 7.9$  Hz, 2H), 7.48 (t,  $J = 8.0$  Hz, 2H), 7.42 (t,  $J = 7.6$  Hz, 2H), 7.33 (d,  $J = 7.4$  Hz, 1H), 7.25 (d,  $J = 6.2$  Hz, 2H), 2.39 (s, 3H).

$^{13}\text{C}$  NMR (100 MHz,  $\text{CDCl}_3$ )  $\delta$  141.2, 138.4, 137.1, 129.5, 128.8, 127.1, 127.0, 21.2.

**methyl [1,1'-biphenyl]-4-carboxylate (3n)<sup>S1</sup>**



$^1\text{H}$  NMR (400 MHz,  $\text{CDCl}_3$ )  $\delta$  8.10 (d,  $J = 8.5$  Hz, 2H), 7.63 (dd,  $J = 14.8, 7.8$  Hz, 4H), 7.46 (t,  $J = 7.4$  Hz, 2H), 7.38 (t,  $J = 7.3$  Hz, 1H), 3.93 (s, 3H).

$^{13}\text{C}$  NMR (100 MHz,  $\text{CDCl}_3$ )  $\delta$  167.0, 145.7, 140.0, 130.1, 129.0, 128.2, 127.3, 127.2, 52.1.

**methyl [1,1'-biphenyl]-4-carboxylate (3o)<sup>S4</sup>**



$^1\text{H}$  NMR (400 MHz,  $\text{CDCl}_3$ )  $\delta$  10.06 (s, 1H), 7.95 (d,  $J = 8.3$  Hz, 2H), 7.75 (d,  $J = 8.2$  Hz, 2H), 7.64 (d,  $J = 7.1$  Hz, 2H), 7.48 (t,  $J = 7.4$  Hz, 2H), 7.42 (t,  $J = 7.3$  Hz, 1H).

$^{13}\text{C}$  NMR (100 MHz,  $\text{CDCl}_3$ )  $\delta$  192.0, 147.2, 139.7, 135.2, 130.3, 129.0, 128.5, 127.7, 127.4.

**[1,1'-biphenyl]-3-carbonitrile (3p)<sup>S1</sup>**



$^1\text{H}$  NMR (400 MHz,  $\text{CDCl}_3$ )  $\delta$  7.86 (s, 1H), 7.81 (d,  $J = 7.8$  Hz, 1H), 7.63 (d,  $J = 7.7$  Hz, 1H), 7.55 (dt,  $J = 11.1, 4.8$  Hz, 3H), 7.48 (t,  $J = 7.3$  Hz, 2H), 7.41 (t,  $J = 7.2$  Hz, 1H).

$^{13}\text{C}$  NMR (100 MHz,  $\text{CDCl}_3$ )  $\delta$  142.5, 138.9, 131.5, 130.7, 130.7, 129.6, 129.2, 128.4, 127.1, 118.9, 113.0.

**3,5-dimethoxy-1,1'-biphenyl (3q)<sup>S7</sup>**



$^1\text{H}$  NMR (400 MHz,  $\text{CDCl}_3$ )  $\delta$  7.57 (dt,  $J = 8.3, 1.8$  Hz, 2H), 7.47–7.40 (m, 2H), 7.39–7.32 (m, 1H), 6.73 (d,  $J = 2.3$  Hz, 2H), 6.47 (t,  $J = 2.3$  Hz, 1H), 3.85 (s, 6H).

$^{13}\text{C}$  NMR (100 MHz,  $\text{CDCl}_3$ )  $\delta$  161.1, 143.5, 141.2, 128.7, 127.6, 127.2, 105.5, 99.3, 55.4.

**[1,1'-biphenyl]-2-carbonitrile (3r)<sup>S8</sup>**



$^1\text{H}$  NMR (400 MHz,  $\text{CDCl}_3$ )  $\delta$  7.77–7.72 (m, 1H), 7.62 (td,  $J = 7.7, 1.4$  Hz, 1H), 7.58–7.53 (m, 2H), 7.52–7.39 (m, 5H).

$^{13}\text{C}$  NMR (100 MHz,  $\text{CDCl}_3$ )  $\delta$  145.5, 138.2, 133.8, 132.9, 130.1, 128.8, 128.8, 127.6, 118.8, 111.3.

## References

- S1 S. Yang, H. Li, X. Yu, J. An and M. Szostak, *J. Org. Chem.*, **2022**, *87*, 15250-15260.
- S2 L. Chen, H. Lang, L. Fang, M. Zhu, J. Liu, J. Yu and L. Wang, *Eur. J. Org. Chem.*, **2014**, *2014*, 4953-4957.
- S3 N. Tsuchiya, T. Nojiri and T. Nishikata, *Chemistry*, **2024**, *30*, e202303271.
- S4 L. Li, Z. Chen, H. Zhong and R. Wang, *Chemistry*, **2014**, *20*, 3050-3060.
- S5 Y. S. Jang, S. M. Nam, G. E. Son, J. Lee and C. P. Park, *Bull. Korean Chem. Soc.*, **2020**, *41*, 374-377.
- S6 H. Hayashi, B. Wang, X. Wu, S. J. Teo, A. Kaga, K. Watanabe, R. Takita, E. K. L. Yeow and S. Chiba, *Adv. Synth. Catal.*, **2020**, *362*, 2223-2231.
- S7 C. Zhong, M. Liu, X. Qiu, H. Wei, B. Cui, Y. Shi and C. Cao, *J. Org. Chem.*, **2023**, *88*, 13418-13426.
- S8 Y. Yan, J. Sun, G. Li, L. Yang, W. Zhang, R. Cao, C. Wang, J. Xiao and D. Xue, *Org Lett.*, **2022**, *24*, 2271-2275.

**Fig. S6**  $^1\text{H}$  and  $^{13}\text{C}$  NMR spectra of **3a**



**Fig. S7**  $^1\text{H}$  and  $^{13}\text{C}$  NMR spectra of **3b**



Fig. S8  $^1\text{H}$ ,  $^{13}\text{C}$  and  $^{19}\text{F}$  NMR spectra of **3c**



**Fig. S9**  $^1\text{H}$  and  $^{13}\text{C}$  NMR spectra of **3d**





**Fig. S10**  $^1\text{H}$  and  $^{13}\text{C}$  NMR spectra of **3e**



**Fig. S11**  $^1\text{H}$  and  $^{13}\text{C}$  NMR spectra of **3f**



**Fig. S12**  $^1\text{H}$  and  $^{13}\text{C}$  NMR spectra of **3g**



**Fig. S13**  $^1\text{H}$  and  $^{13}\text{C}$  NMR spectra of **3h**



**Fig. S14**  $^1\text{H}$  and  $^{13}\text{C}$  NMR spectra of **3i**



**Fig. S15**  $^1\text{H}$  and  $^{13}\text{C}$  NMR spectra of **3j**



**Fig. S16**  $^1\text{H}$  and  $^{13}\text{C}$  NMR spectra of **3k**



Fig. S17  $^1\text{H}$  and  $^{13}\text{C}$  NMR spectra of **31**





**Fig. S18**  $^1\text{H}$  and  $^{13}\text{C}$  NMR spectra of **3m**



**Fig. S19**  $^1\text{H}$  and  $^{13}\text{C}$  NMR spectra of **3n**



**Fig. S20**  $^1\text{H}$  and  $^{13}\text{C}$  NMR spectra of **3o**



**Fig. S21**  $^1\text{H}$  and  $^{13}\text{C}$  NMR spectra of **3p**



**Fig. S22**  $^1\text{H}$  and  $^{13}\text{C}$  NMR spectra of **3q**



**Fig. S23**  $^1\text{H}$  and  $^{13}\text{C}$  NMR spectra of **3r**
